# Supplementary material
Source: MDPI journal article supplement (https://www.mdpi.com/2311-7524/8/2/122)
Supplement: s1 [file s1]

**Table S1.** List of *Brachystelma* species in South Africa based on the South African National Biodiversity Institute (SANBI) Red List (<http://redlist.sanbi.org/genus.php?genus=2640>, accessed on 18/01/2022). CR—Critically rare, CR PE—Critically Endangered, Possibly Extinct, DDD—Data deficient (insufficient information), DDT—Data deficient (taxonomically problematic), EN—Endangered, EX—Extinct, LC—Least concern, NT—Near threatened, R—Rare, VU—Vulnerable.

|     | Species                                                                                  | Status |
|-----|------------------------------------------------------------------------------------------|--------|
| 1.  | <i>Brachystelma angustum</i> Peckover                                                    | VU     |
| 2.  | <i>Brachystelma arnotii</i> Baker                                                        | DDD    |
| 3.  | <i>Brachystelma australe</i> R.A.Dyer                                                    | LC     |
| 4.  | <i>Brachystelma barberae</i> Harv. ex Hook.f.                                            | LC     |
| 5.  | <i>Brachystelma brevipedicellatum</i> Turrill                                            | LC     |
| 6.  | <i>Brachystelma bruceae</i> R.A.Dyer subsp. <i>bruceae</i>                               | LC     |
| 7.  | <i>Brachystelma bruceae</i> R.A.Dyer subsp. <i>hirsutum</i> R.A.Dyer                     | LC     |
| 8.  | <i>Brachystelma burchellii</i> (Decne.) Peckover var. <i>burchellii</i>                  | LC     |
| 9.  | <i>Brachystelma burchellii</i> (Decne.) Peckover var. <i>grandiflorum</i> (N.E.Br.) Meve | LC     |
| 10. | <i>Brachystelma caffrum</i> (Schltr.) N.E.Br.                                            | VU     |
| 11. | <i>Brachystelma campanulatum</i> N.E.Br.                                                 | NT     |
| 12. | <i>Brachystelma canum</i> R.A.Dyer                                                       | CR PE  |
| 13. | <i>Brachystelma cathcartense</i> R.A.Dyer                                                | VU     |
| 14. | <i>Brachystelma chloranthum</i> (Schltr.) Peckover                                       | LC     |
| 15. | <i>Brachystelma chlorozonum</i> E.A.Bruce                                                | NT     |
| 16. | <i>Brachystelma christianeae</i> Peckover                                                | VU     |
| 17. | <i>Brachystelma circinatum</i> E.Mey.                                                    | LC     |
| 18. | <i>Brachystelma coddii</i> R.A.Dyer                                                      | LC     |
| 19. | <i>Brachystelma comptum</i> N.E.Br.                                                      | VU     |
| 20. | <i>Brachystelma cummingii</i> A.P.Dold                                                   | EN     |
| 21. | <i>Brachystelma cupulatum</i> R.A.Dyer                                                   | LC     |
| 22. | <i>Brachystelma decipiens</i> N.E.Br.                                                    | LC     |
| 23. | <i>Brachystelma delicatum</i> R.A.Dyer                                                   | VU     |
| 24. | <i>Brachystelma dimorphum</i> R.A.Dyer subsp. <i>dimorphum</i>                           | VU     |
| 25. | <i>Brachystelma dimorphum</i> R.A.Dyer subsp. <i>gratum</i> R.A.Dyer                     | CR     |
| 26. | <i>Brachystelma discoideum</i> R.A.Dyer                                                  | CR PE  |
| 27. | <i>Brachystelma duplicatum</i> R.A.Dyer                                                  | CR     |
| 28. | <i>Brachystelma dyeri</i> K.Balkwill & M.Balkwill                                        | VU     |
| 29. | <i>Brachystelma elongatum</i> (Schltr.) N.E.Br.                                          | DDT    |
| 30. | <i>Brachystelma filifolium</i> (N.E.Br.) Peckover                                        | LC     |
| 31. | <i>Brachystelma foetidum</i> Schltr.                                                     | LC     |
| 32. | <i>Brachystelma frankisiae</i> N.E.Br. subsp. <i>frankisiae</i>                          | VU     |
| 33. | <i>Brachystelma frankisiae</i> N.E.Br. subsp. <i>grandiflorum</i> A.P.Dold & Bruyns      | VU     |
| 34. | <i>Brachystelma gemmeum</i> R.A.Dyer                                                     | LC     |
| 35. | <i>Brachystelma gerrardii</i> Harv.                                                      | EN     |
| 36. | <i>Brachystelma glenense</i> R.A.Dyer                                                    | DDT    |
| 37. | <i>Brachystelma gracile</i> E.A.Bruce                                                    | LC     |
| 38. | <i>Brachystelma gracillimum</i> R.A.Dyer                                                 | CR     |
| 39. | <i>Brachystelma gymnopodum</i> (Schltr.) Bruyns                                          | LC     |
| 40. | <i>Brachystelma hirtellum</i> Weim.                                                      | NT     |
| 41. | <i>Brachystelma huttonii</i> (Harv.) N.E.Br.                                             | R      |
| 42. | <i>Brachystelma incanum</i> R.A.Dyer                                                     | VU     |
| 43. | <i>Brachystelma inconspicuum</i> S.Venter                                                | R      |
| 44. | <i>Brachystelma kerzneri</i> Peckover                                                    | VU     |

|     |                                                                                          |     |
|-----|------------------------------------------------------------------------------------------|-----|
| 45. | <i>Brachystelma longifolium</i> (Schltr.) N.E.Br.                                        | VU  |
| 46. | <i>Brachystelma luteum</i> Peckover                                                      | VU  |
| 47. | <i>Brachystelma macropetalum</i> (Schltr.) N.E.Br.                                       | LC  |
| 48. | <i>Brachystelma meyerianum</i> Schltr.                                                   | R   |
| 49. | <i>Brachystelma micranthum</i> E.Mey.                                                    | DDD |
| 50. | <i>Brachystelma minimum</i> R.A.Dyer                                                     | R   |
| 51. | <i>Brachystelma minor</i> E.A.Bruce                                                      | VU  |
| 52. | <i>Brachystelma modestum</i> R.A.Dyer                                                    | NT  |
| 53. | <i>Brachystelma molaventi</i> Peckover & A.E.van Wyk                                     | VU  |
| 54. | <i>Brachystelma montanum</i> R.A.Dyer                                                    | CR  |
| 55. | <i>Brachystelma nanum</i> (Schltr.) N.E.Br.                                              | LC  |
| 56. | <i>Brachystelma natalense</i> (Schltr.) N.E.Br.                                          | CR  |
| 57. | <i>Brachystelma ngomense</i> R.A.Dyer                                                    | EN  |
| 58. | <i>Brachystelma occidentale</i> Schltr.                                                  | CR  |
| 59. | <i>Brachystelma oianthum</i> Schltr.                                                     | LC  |
| 60. | <i>Brachystelma pachypodium</i> R.A.Dyer                                                 | LC  |
| 61. | <i>Brachystelma parvulum</i> R.A.Dyer                                                    | VU  |
| 62. | <i>Brachystelma perditum</i> R.A.Dyer                                                    | R   |
| 63. | <i>Brachystelma petraeum</i> R.A.Dyer                                                    | VU  |
| 64. | <i>Brachystelma praelongum</i> S.Moore                                                   | LC  |
| 65. | <i>Brachystelma pulchellum</i> (Harv.) Schltr.                                           | NT  |
| 66. | <i>Brachystelma pygmaeum</i> (Schltr.) N.E.Br. subsp. <i>flavidum</i> (Schltr.) R.A.Dyer | LC  |
| 67. | <i>Brachystelma pygmaeum</i> (Schltr.) N.E.Br. subsp. <i>pygmaeum</i>                    | LC  |
| 68. | <i>Brachystelma ramosissimum</i> (Schltr.) N.E.Br.                                       | LC  |
| 69. | <i>Brachystelma remotum</i> R.A.Dyer                                                     | R   |
| 70. | <i>Brachystelma rubellum</i> (E.Mey.) Peckover                                           | LC  |
| 71. | <i>Brachystelma sandersonii</i> (Oliv.) N.E.Br.                                          | VU  |
| 72. | <i>Brachystelma schizoglossoides</i> (Schltr.) N.E.Br.                                   | LC  |
| 73. | <i>Brachystelma schoenlandianum</i> Schltr.                                              | EX  |
| 74. | <i>Brachystelma setosum</i> Peckover                                                     | VU  |
| 75. | <i>Brachystelma stellatum</i> E.A.Bruce & R.A.Dyer                                       | R   |
| 76. | <i>Brachystelma stenophyllum</i> (Schltr.) R.A.Dyer                                      | LC  |
| 77. | <i>Brachystelma swazicum</i> R.A.Dyer                                                    | LC  |
| 78. | <i>Brachystelma tabularium</i> R.A.Dyer                                                  | DDT |
| 79. | <i>Brachystelma tenellum</i> R.A.Dyer                                                    | VU  |
| 80. | <i>Brachystelma tenue</i> R.A.Dyer                                                       | EN  |
| 81. | <i>Brachystelma theronii</i> Bruyns                                                      | LC  |
| 82. | <i>Brachystelma thunbergii</i> N.E.Br.                                                   | LC  |
| 83. | <i>Brachystelma tuberosum</i> (Meerb.) R.Br. ex Sims                                     | LC  |
| 84. | <i>Brachystelma vahrmeijeri</i> R.A.Dyer                                                 | EN  |
| 85. | <i>Brachystelma villosum</i> (Schltr.) N.E.Br.                                           | DDD |
